# Supplementary material
Source: publisher figshare collection journal article supplement (https://diabetesjournals.figshare.com/ndownloader/files/38965046)
Supplement: Supplementary file 1 [file 38965046]

SUPPLEMENTARY MATERIALS

**Estimate the global disease burden of COVID-19 associated with diabetes**

Table of Contents

[**1. Database search strategy 2**](#_Toc122592440)

[**2. Study selection and the definition of different COVID-19 disease states 3**](#_Toc122592441)

[**3. Tool used for risk of bias 6**](#_Toc122592442)

[**4. The definition of subgroup variables by countries 7**](#_Toc122592443)

[**5. Method for calculating estimates for COVID-19 severe outcomes attributable to diabetes 8**](#_Toc122592444)

[**Appendix table 1: Global pooled prevalence of diabetes in confirmed COVID-19 patients. 10**](#_Toc122592445)

[**Appendix table 2: Global pooled prevalence of diabetes in non-hospitalized COVID-19 patients. 11**](#_Toc122592446)

[**Appendix table 3: Global pooled prevalence of diabetes in hospitalized COVID-19 patients. 12**](#_Toc122592447)

[**Appendix table 4: Global pooled prevalence of diabetes in non-severe COVID-19 patients. 13**](#_Toc122592448)

[**Appendix table 5: Global pooled prevalence of diabetes in severe COVID-19 patients. 14**](#_Toc122592449)

[**Appendix table 6: Global pooled prevalence of diabetes in deceased COVID-19 patients. 15**](#_Toc122592450)

[**Appendix table 7: Meta regression analysis for the variation of diabetes prevalence in confirmed COVID-19 patients. 16**](#_Toc122592451)

[**Appendix table 8: Meta regression analysis for the variation of diabetes prevalence in non-hospitalized COVID-19 patients. 17**](#_Toc122592452)

[**Appendix table 9: Meta regression analysis for the variation of diabetes prevalence in hospitalized COVID-19 patients. 18**](#_Toc122592453)

[**Appendix table 10: Meta regression analysis for the variation of diabetes prevalence in non-severe COVID-19 patients. 19**](#_Toc122592454)

[**Appendix table 11: Meta regression analysis for the variation of diabetes prevalence in severe COVID-19 patients. 20**](#_Toc122592455)

[**Appendix table 12: Meta regression analysis for the variation of diabetes prevalence in deceased COVID-19 patients. 21**](#_Toc122592456)

[**Appendix table 13: Global relative risk (RR) and population attributable fraction (PAF) of patients with diabetes on COVID-19-related presence of severe disease. 22**](#_Toc122592457)

[**Appendix table 14: Global relative risk (RR) and population attributable fraction (PAF) of patients with diabetes on COVID-19-related death. 23**](#_Toc122592458)

[**Figure S1: Global pooled prevalence of diabetes in confirmed COVID-19 patients. 24**](#_Toc122592459)

[**Figure S2: Global pooled prevalence of diabetes in non-hospitalized COVID-19 patients. 25**](#_Toc122592460)

[**Figure S3: Global pooled prevalence of diabetes in hospitalized COVID-19 patients. 26**](#_Toc122592461)

[**Figure S4: Global pooled prevalence of diabetes in non-severe COVID-19 patients. 27**](#_Toc122592462)

[**Figure S5: Global pooled prevalence of diabetes in severe COVID-19 patients. 28**](#_Toc122592463)

[**Figure S6: Global pooled prevalence of diabetes in deceased COVID-19 patients. 29**](#_Toc122592464)

[**Reference: 30**](#_Toc122592465)

# **1. Database search strategy**

**PUBMED**

(English [Language]) AND (((COVID-19[Title/Abstract]) OR (SARS-COV-2[Title/Abstract])) AND ((clinical character*[Title/Abstract]) OR (clinical feature*[Title/Abstract])) AND (diabet* OR glucose OR sugar OR glycated hemoglobin OR hyperglyc* OR HbA1c))

**(7st July 2021: 527) (24th May 2022: 777)**

**
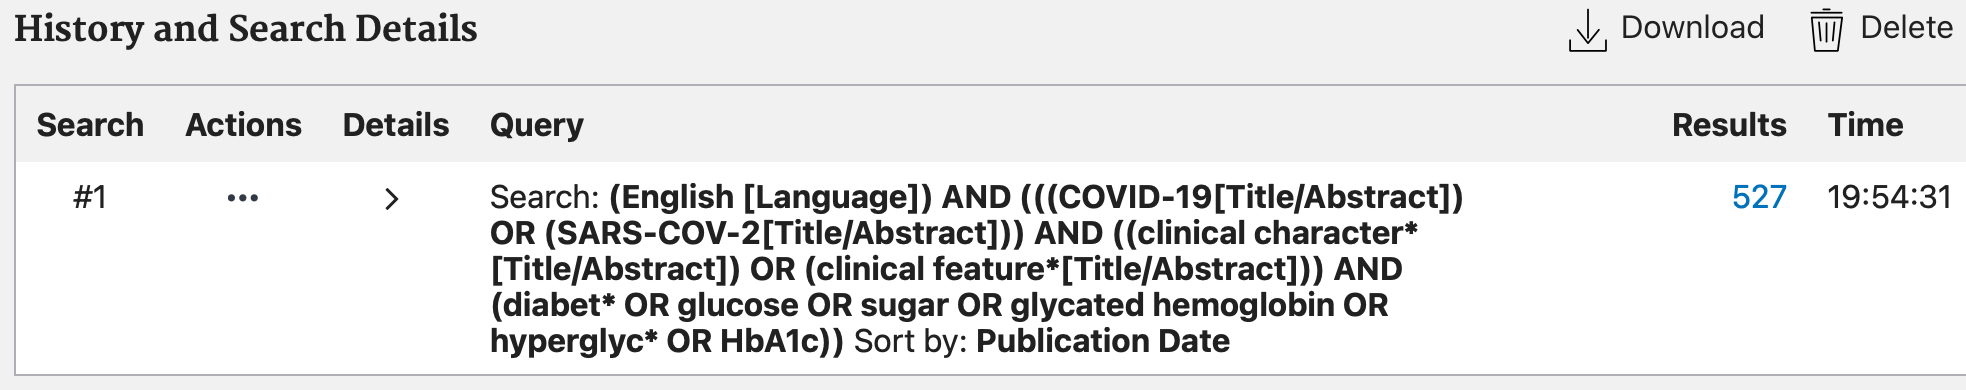
**

**
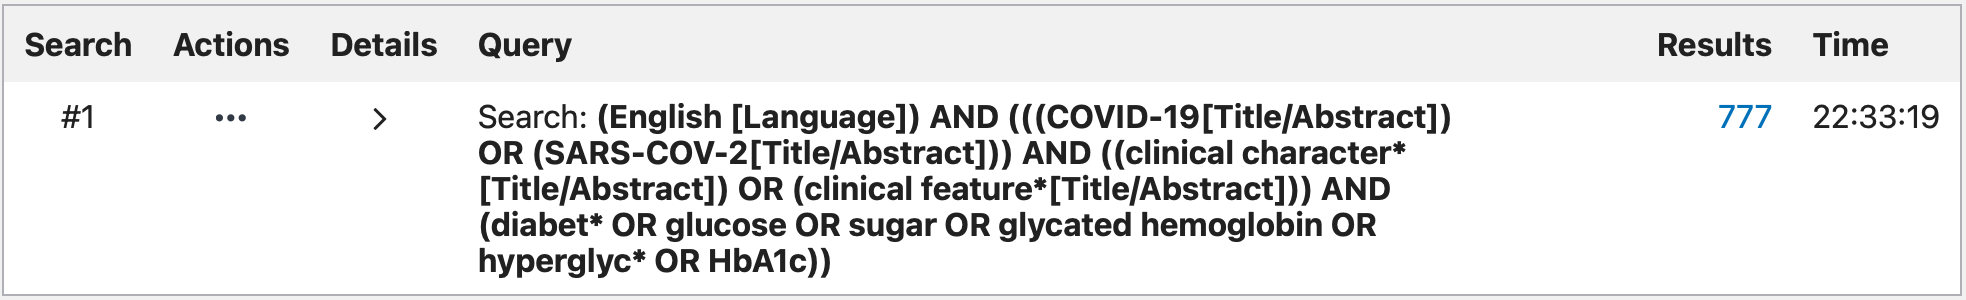
**

**(**[**https://pubmed.ncbi.nlm.nih.gov/advanced/**](https://pubmed.ncbi.nlm.nih.gov/advanced/)**)**

**EMBASE**

(COVID-19 OR SARS-COV-2):ab AND ((clinical character*) OR (clinical feature*)):ab AND (diabet* OR glucose OR sugar OR hyperglyc* OR (glycated hemoglobin) OR HbA1c) AND [english]/lim

**(7st July 2021: 1,313) (24th May 2022: 2,508)**

**
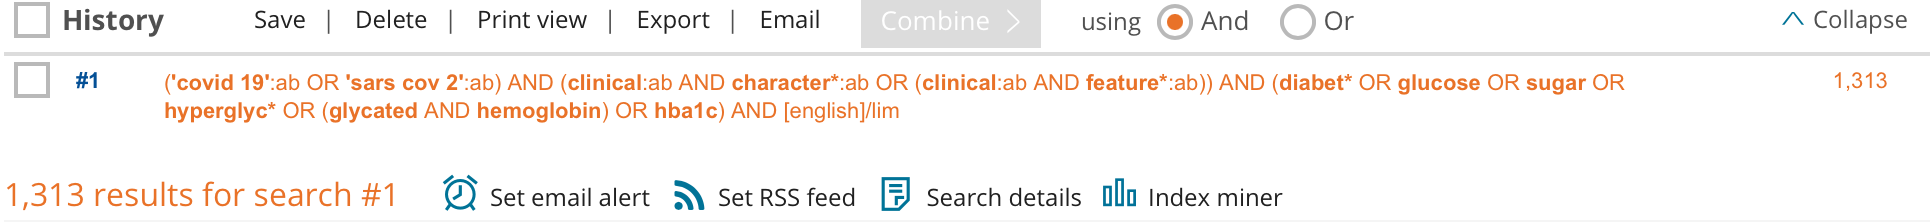
**

**
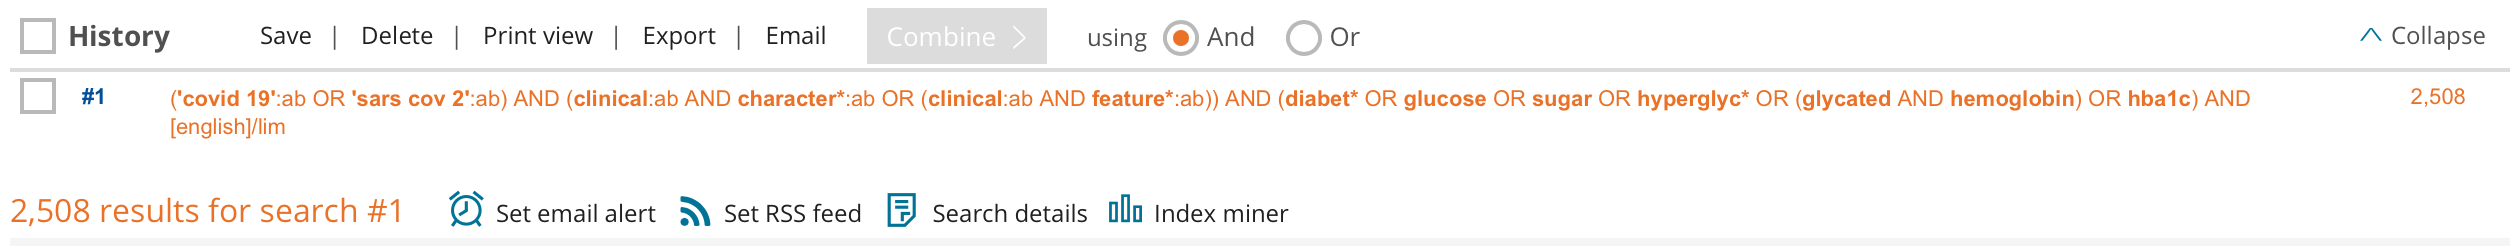
**

**(**[**https://www.embase.com/#advancedSearch/default**](https://www.embase.com/#advancedSearch/default)**)**

**WEB OF SCIENCE**

TS=(COVID-19 OR SARS-COV-2) AND TS=(clinical character* OR clinical feature*) AND TS=( diabet* OR glucose OR sugar OR hyperglyc* OR glycated hemoglobin OR HbA1c) and English (Languages)

**(7st July 2021: 1,289) (24th May 2022: 2,052)**


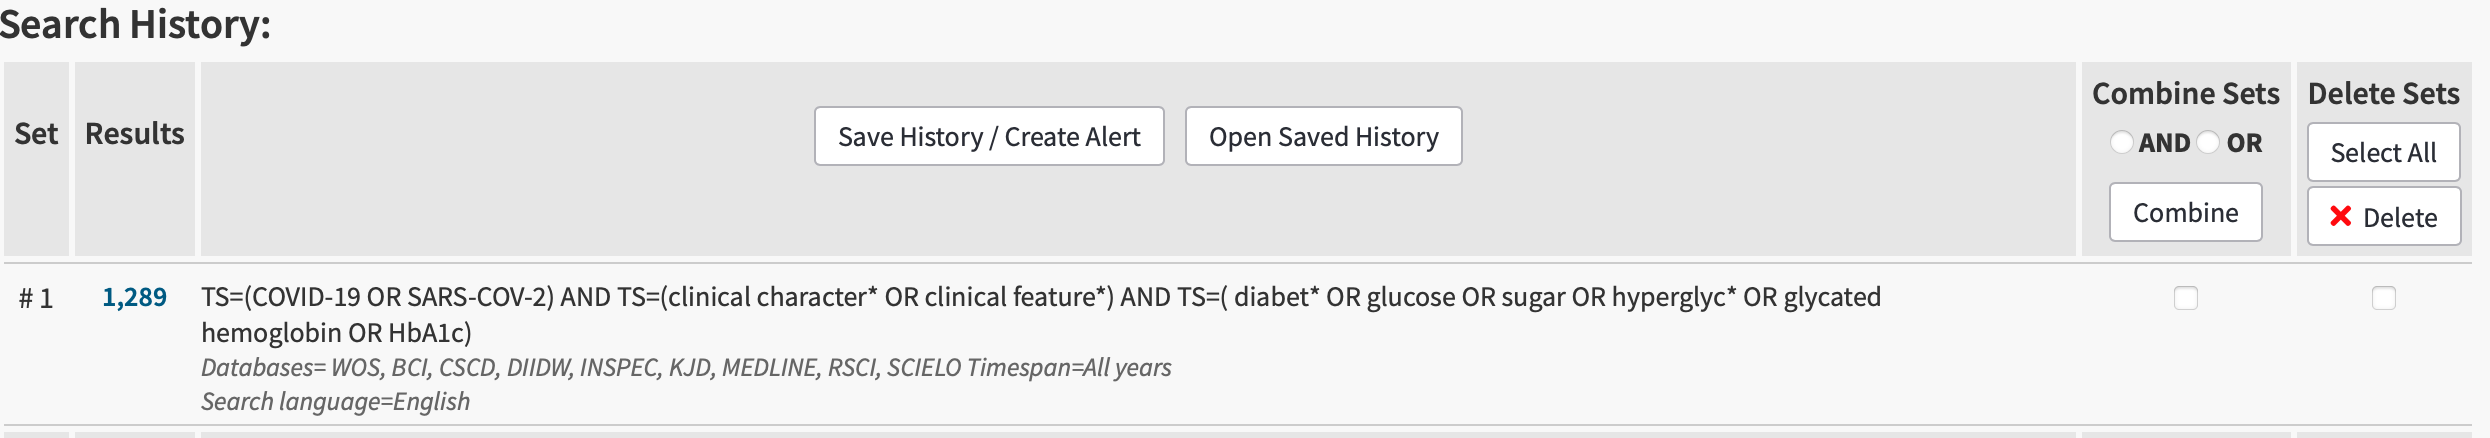


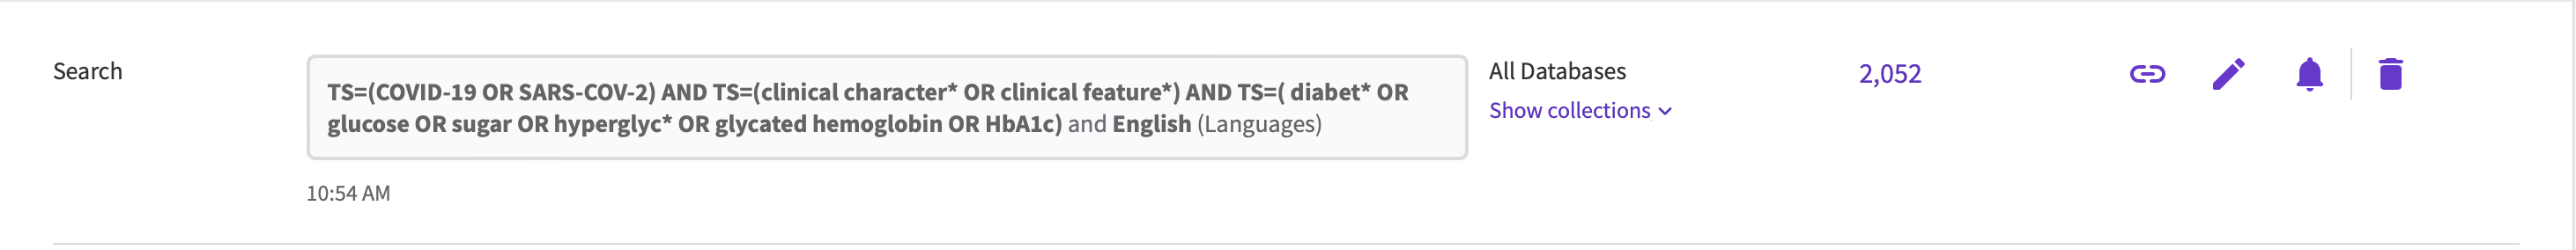


(<http://apps.webofknowledge.com/UA_AdvancedSearch_input.do?SID=7F2ROvHiCFB7CcHJYIx&product=UA&search_mode=AdvancedSearch>)

# **2. Study selection and the definition of different COVID-19 disease states**

**Study selection**

We initially identified 5,337 records. After eliminating duplicates, 3,427 records remained. We screened the titles and abstracts and excluded 2,537 ineligible records that did not mention diabetes prevalence or belong to a meta-analysis. We scrutinized full texts of the remaining 890 papers for eligibility, of which 161 were excluded, and 729 studies were eventually included in our meta-analysis (Figure 1). The complete reference list of all included studies is available as Additional files appendix.

Of the 729 included studies, 100 (13.7%) reported the prevalence of diabetes in confirmed COVID-19 patients, 34 (5.7%) in non-hospitalized and 513 (70.4%) in hospitalized patients. Further, 101 (13.9%), 216 (29.6%) and 217 (29.8%) studies reported prevalence in non-severe, severe, and deceased patients, respectively. In total, 321 studies (44.0%) had a low risk of bias, and 408 (56.0%) had a high risk. A large proportion of the included studies were conducted in China (194, 26.6%) and the United States (109, 15.0%).

Based on the WHO diagnostic criteria of COVID-19 and severity spectrum, we divided the included patients into six different COVID-19 disease states as follow.

- Confirmed COVID-19 patients: individuals who were diagnosed as having COVID-19 on the basis of WHO criteria.1
- Non-hospitalized COVID-19 patients: cases who were not managed in a hospital due to mild symptoms.
- Hospitalized COVID-19 patients: cases who were managed in a hospital due to mild/moderate symptoms.
- Non-severe COVID-19 patients: cases who were managed in a hospital but did not develop dyspnoea and/or hypoxemia.
- Severe COVID-19 patients: cases who were managed in a hospital and developed dyspnoea and/or hypoxemia or required intensive care unit (ICU).
- Deceased COVID-19 patients: COVID-19-related death

**Study selection**

Prevalence was defined as the proportion of diabetes mellitus in COVID-19 population

**Global prevalence of diabetes by countries in various stratification groups of COVID-19.** (A) In confirmed cases; (B) In hospitalized cases; (C) In non-hospitalized cases; (D) In non-severe cases; (E) In severe cases;(F) In deceased cases. The world maps display these estimates in color codes with the darkest shades representing the highest estimates of 30-45% and lighter colors to indicate 15-30%, <15% and no data, respectively.

# **3. Tool used for risk of bias**

| **Items** |
| --- |
| **1. Was the study’s target population a close representation of the population in relation to relevant variables?**  *0. No or Unclear*  *1. Clear description of COVID-19 diagnosis: clinically or laboratory* |
| **2. Was the sampling frame a true or close representation of the target population?**  *0. No or Unclear*  *1. Yes* |
| **3. Was some form of random selection used to select the sample, OR was a census undertaken?**  *0. No or Unclear*  *1. Yes* |
| **4. Was the likelihood of nonresponse bias minimal?**  *0. No or Unclear*  *1. Yes* |
| **5. Were data collected directly from the subjects (as opposed to a proxy)?**  *0. No: proxy, databases, medical reports only*  *1. Directly from the subjects* |
| **6. Was an acceptable case definition of diabetes mellitus used in the study?**  *0. Self-Reported or Unclear*  *1. Laboratory-based, Taking antidiabetic treatment* |
| **7. Was the study method that diagnosed diabetes mellitus shown to have validity and reliability?**  *0. No description of the method*  *1. Yes: Fasting plasma glucose, 2h-Plasma Glucose-OGTT, Random plasma glucose, Taking antidiabetics, HbA1c* |
| **8. Was the same mode of data collection used for all subjects?**  *0. No or Unclear*  *1. Yes* |
| **9. Was the overall diabetes mellitus sample size sufficiently large to provide confidence in the findings (i.e., confirmed cases N>100)?**  *0. No or Unclear*  *1. Yes* |
| **10. Were the numerator(s) and denominator(s) for the parameter of interest appropriate and clearly reported?**  *0. No or Unclear*  *1. Yes* |

Items presented include criteria adopted by Noubiap JJ et al in their systematic review of diabetes prevalence and a modified version of a critical appraisal tool for use in systematic reviews of prevalence studies.2,3

# **4. The definition of subgroup variables by countries**

Based on the global COVID-19 incidence cases,4 we used Tri-logistic fitting from a mature tool of Loglet Lab to identify the time nodes of various COVID-19 epidemic waves worldwide.5 We compared the time nodes (T1, T2) with study period of including samples and confirmed which epidemic waves (e.g., first wave, second wave, and third wave) most cases of studies belong to.


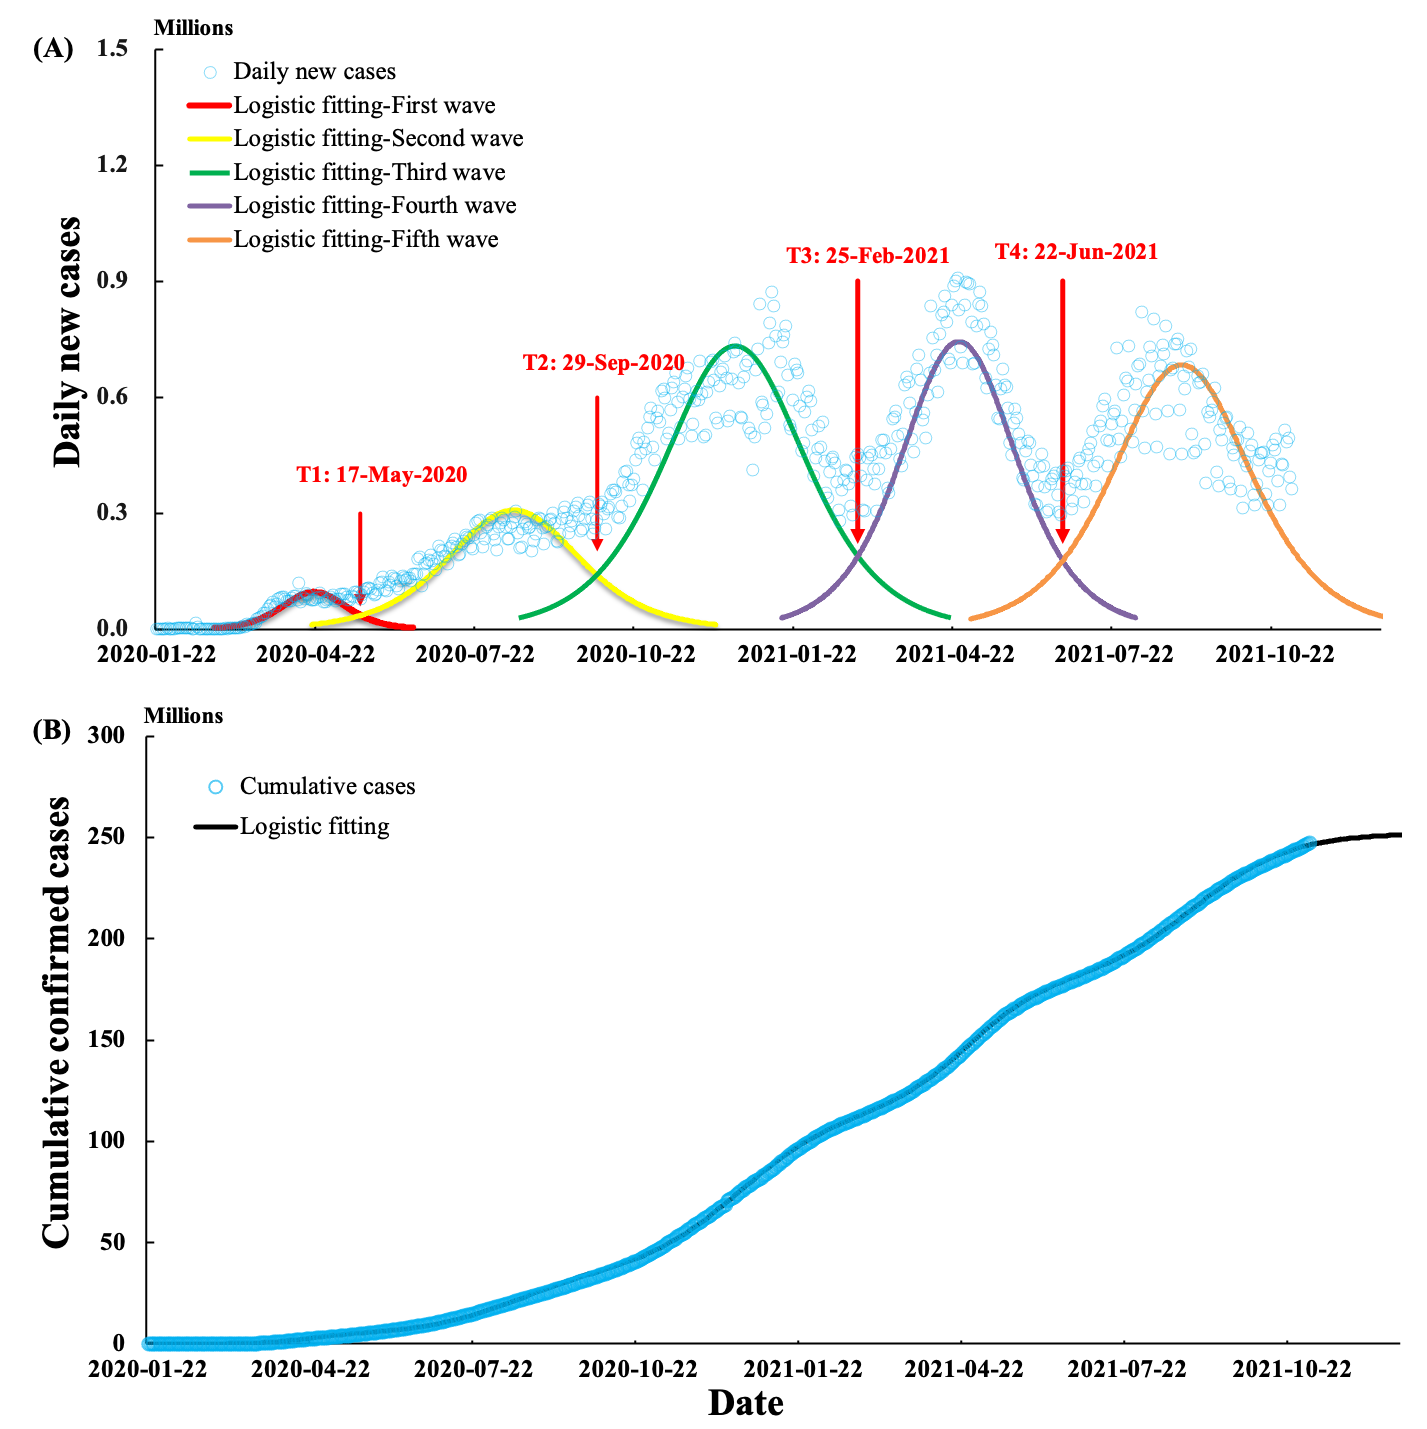


# **5. Method for calculating estimates for COVID-19 severe outcomes attributable to diabetes**

*Step 1*

We performed a systematic literature review and meta-analysis to calculate the pooled prevalence of diabetes in various disease statuses with COVID-19 infection (confirmed, non-hospitalized, hospitalized, non-severe, severe, and deceased).

*Step 2*

We first constructed a modified version of the comparative risk assessment (CRA) model. For example, in a population cohort of hospitalized COVID-19 patients with a sample size A, the number of COVID-19 patients who developed **severe outcomes (presence of severe disease or deceased)** is B and otherwise is C (B+C=A).

Given that all the COVID-19 patients with severe outcomes progressed from hospitalized COVID-19 patients, we calculate the overall incidence rate of severe outcomes in the hospitalized COVID-19 patients cohort as B/(A***Δ**T), where **Δ**T is the average time difference between the two observation time points (time point 2 – time point 1).

Similarly, for non-diabetes patients in the population, we calculate the incidence rate of severe outcomes (incidence 1) as **B*(1-P2)/(A*(1-P1)*ΔT).** We have shaded the numerator and denominator of this ratio in blue for non-diabetes patients in the above diagram.

Further, for diabetes patients, with the same method, the incidence rate of severe outcomes (incidence 2) is then calculated as **B*P2/(A*P1*ΔT).** We have shaded the numerator and denominator of this ratio in orange for diabetes patients in the above diagram.

Based on the definition of relative risk (*risk ratio, RR*), we therefore calculate the RR as incidence 2/incidence 1, which is subsequently simplified to **P2*(1-P1)/ (P1*(1-P2))**.

Taken together with the definition of PAF (equation 3 in the above diagram), we substitute the expression of RR into the equation and obtain PAF= (P2-P1)/ (1-P1).

*Step 3*

To measure the uncertainty from estimates of the RR and PAF, we generated 10,000 samples in the pooled prevalence of diabetes of various COVID-19 disease status to perform the calculation of 95% confidence intervals and applied a triangular distribution. We ran these analyses to estimate the PAF of diabetes on COVID-19-related death, ICU-admission, and severe COVID-19 progression for all subgroup variables of previous meta-analyses and summarized the results as figures and tables. When possible, we assessed these PAFs of diabetes by countries.

# **Appendix table 1: Global pooled prevalence of diabetes in confirmed COVID-19 patients.**

|  | Pooled prevalence (95%CI) | Number of studies | Number of participants | *I*2 | *p*heterogeneity | *p*difference |
| --- | --- | --- | --- | --- | --- | --- |
| Overall | 14.7% (12.5, 16.9) | 100 | 1,306,236 | 1.000 | <0.01 | — |
| Studies with low risk of bias | 16.4% (13.3, 19.7) | 52 | 19,305,484 | 1.000 | <0.01 | 0.11 |
| By COVID-19 waves |  |  |  |  |  | <0.01 |
| First wave | 15.2% (12.7, 17.9) | 70 | 1,474,857 | 0.999 | <0.01 |  |
| Second wave | 12.6% (8.6, 17.2) | 25 | 22,993,251 | 1.000 | <0.01 |  |
| Third wave | 25.2% (18.7, 32.4) | 3 | 5,624 | 0.954 | <0.01 |  |
| Fourth wave | -- | -- | -- | -- | -- |  |
| Fifth wave | -- | -- | -- | -- | -- |  |
| By WHO regions |  |  |  |  |  | 0.02 |
| African region | 10.8% (3.0, 22.6) | 4 | 12,740 | 0.995 | <0.01 |  |
| Americas region | 19.0% (15.5, 22.8) | 40 | 2,855,054 | 1.000 | <0.01 |  |
| Eastern Mediterranean | 13.8% (7.2, 22.3) | 14 | 155,290 | 0.992 | <0.01 |  |
| European region | 10.4% (6.5, 15.1) | 15 | 17,363,692 | 0.998 | <0.01 |  |
| South-East Asia | 15.0% (8.3, 23.2) | 7 | 3,710 | 0.983 | <0.01 |  |
| Western Pacific | 10.6% (7.5, 14.2) | 18 | 51,977 | 0.973 | <0.01 |  |
| By country income level |  |  |  |  |  | <0.01 |
| Low | 3.1% (2.5, 3.8) | 1 | 2,617 | -- | -- |  |
| Middle | 12.3% (10.2, 14.6) | 43 | 2,448,603 | 0.999 | <0.01 |  |
| High | 17.0% (13.5, 20.9) | 53 | 17,990,667 | 1.000 | <0.01 |  |
| By HAQ |  |  |  |  |  | 0.06 |
| Low | 14.7% (9.9, 20.3) | 14 | 17,350 | 0.988 | <0.01 |  |
| Medium | 11.2% (8.5, 14.3) | 37 | 2,442,471 | 0.999 | <0.01 |  |
| High | 17.5% (14.0, 21.3) | 47 | 17,982,642 | 1.000 | <0.01 |  |
| By DM prevalence |  |  |  |  |  | <0.01 |
| Low | 10.6% (8.5, 12.9) | 38 | 17,823,984 | 0.996 | <0.01 |  |
| Medium | 19.0% (14.7, 23.7) | 37 | 545,742 | 0.999 | <0.01 |  |
| High | 14.9% (10.6, 19.9) | 23 | 2,072,737 | 0.998 | <0.01 |  |
| By undiagnosed DM proportion |  |  |  |  |  | <0.01 |
| Low | 20.6% (15.6, 26.2) | 29 | 17,838,896 | 1.000 | <0.01 |  |
| Medium | 13.7% (11.5, 16.1) | 52 | 2,588,115 | 0.999 | <0.01 |  |
| High | 8.4% (4.8, 12.9) | 17 | 15,452 | 0.984 | <0.01 |  |
| By IGT |  |  |  |  |  | 0.50 |
| Low | 12.7% (9.7, 16.0) | 31 | 17,503,514 | 0.996 | <0.01 |  |
| Medium | 15.8% (12.8, 19.1) | 59 | 2,927,787 | 0.999 | <0.01 |  |
| High | 13.5% (6.6, 22.5) | 8 | 11,162 | 0.992 | <0.01 |  |
| By IGF |  |  |  |  |  | <0.01 |
| Low | 9.2% (6.6, 12.2) | 24 | 195,248 | 0.983 | <0.01 |  |
| Medium | 11.3% (7.8, 15.2) | 15 | 17,367,289 | 0.998 | <0.01 |  |
| High | 18.0% (14.9, 21.4) | 59 | 2,879,926 | 0.999 | <0.01 |  |

# **Appendix table 2: Global pooled prevalence of diabetes in non-hospitalized COVID-19 patients.**

|  | Pooled prevalence (95%CI) | Number of studies | Number of participants | *I*2 | *p*heterogeneity | *p*difference |
| --- | --- | --- | --- | --- | --- | --- |
| Overall | 10.4% (7.6, 13.6) | 34 | 1,306,236 | 0.994 | <0.01 | -- |
| Studies with low risk of bias | 12.7% (7.3, 19.3) | 15 | 524,249 | 0.997 | <0.01 | 0.23 |
| By COVID-19 waves |  |  |  |  |  | 0.02 |
| First wave | 11.5% (7.5, 16.2) | 23 | 266,268 | 0.990 | <0.01 |  |
| Second wave | 8.7% (5.6, 12.4) | 9 | 1,038,458 | 0.992 | <0.01 |  |
| Third wave | 8.8% (6.8, 11.0) | 1 | 718 | -- | -- |  |
| Fourth wave | -- | -- | -- | -- | -- |  |
| Fifth wave | -- | -- | -- | -- | -- |  |
| By WHO regions |  |  |  |  |  | <0.01 |
| African region | 1.1% (0.3, 2.4) | 1 | 372 | -- | -- |  |
| Americas region | 13.7% (9.2, 18.9) | 16 | 515,835 | 0.997 | <0.01 |  |
| Eastern Mediterranean | 12.8% (4.0, 25.6) | 5 | 6,457 | 0.985 | <0.01 |  |
| European region | 6.6% (4.8, 8.6) | 7 | 780,896 | 0.991 | <0.01 |  |
| South-East Asia | -- | -- | -- | -- | -- |  |
| Western Pacific | 7.1% (1.9, 15.4) | 5 | 2,392 | 0.969 | <0.01 |  |
| By country income level |  |  |  |  |  | <0.01 |
| Low | 1.1% (0.3, 2.4) | 1 | 372 | -- |  |  |
| Middle | 9.8% (7.0, 13.0) | 10 | 1,210,862 | 0.997 | <0.01 |  |
| High | 11.4% (7.5, 15.9) | 23 | 94,718 | 0.987 | <0.01 |  |
| By HAQ |  |  |  |  |  | <0.01 |
| Low | 1.1% (0.3, 2.4) | 1 | 372 | -- |  |  |
| Medium | 9.0% (6.0, 12.6) | 13 | 1,216,991 | 0.997 | <0.01 |  |
| High | 12.2% (7.9, 17.2) | 20 | 88,589 | 0.986 | <0.01 |  |
| By DM prevalence |  |  |  |  |  | <0.01 |
| Low | 4.6% (2.9, 6.6) | 9 | 14,105 | 0.902 | <0.01 |  |
| Medium | 14.9% (9.9, 20.7) | 15 | 837,340 | 0.990 | <0.01 |  |
| High | 10.5% (5.9, 16.2) | 10 | 454,507 | 0.997 | <0.01 |  |
| By undiagnosed DM proportion |  |  |  |  |  | 0.09 |
| Low | 15.3% (9.4, 22.3) | 12 | 74,705 | 0.989 | <0.01 |  |
| Medium | 8.0% (5.4, 11.0) | 19 | 1,229,899 | 0.996 | <0.01 |  |
| High | 9.1% (0.5, 26.4) | 3 | 1,348 | 0.981 | <0.01 |  |
| By IGT |  |  |  |  |  | 0.02 |
| Low | 6.2% (4.5, 8.2) | 8 | 781,018 | 0.989 | <0.01 |  |
| Medium | 12.2% (8.3, 16.6) | 22 | 524,126 | 0.996 | <0.01 |  |
| High | 11.1% (1.6, 27.3) | 4 | 808 | 0.976 | <0.01 |  |
| By IGF |  |  |  |  |  | <0.01 |
| Low | 8.3% (5.2, 12.0) | 9 | 774,660 | 0.984 | <0.01 |  |
| Medium | 3.5% (1.7, 6.0) | 3 | 8,628 | 0.933 | <0.01 |  |
| High | 12.7% (8.6, 17.4) | 22 | 522,664 | 0.996 | <0.01 |  |

# **Appendix table 3: Global pooled prevalence of diabetes in hospitalized COVID-19 patients.**

|  | Pooled prevalence (95%CI) | Number of studies | Number of participants | *I*2 | *p*heterogeneity | *p*difference |
| --- | --- | --- | --- | --- | --- | --- |
| Overall | 21.4% (20.4, 22.5) | 513 | 1,306,236 | 0.998 | <0.01 | -- |
| Studies with low risk of bias | 23.2% (21.6, 24.8) | 234 | 2,086,323 | 0.998 | <0.01 | <0.01 |
| By COVID-19 waves |  |  |  |  |  | <0.01 |
| First wave | 20.2% (19.1, 21.3) | 397 | 987,691 | 0.992 | <0.01 |  |
| Second wave | 26.5% (23.5, 29.5) | 88 | 2,263,102 | 0.999 | <0.01 |  |
| Third wave | 25.4% (20.1, 31.0) | 21 | 56,523 | 0.967 | <0.01 |  |
| Fourth wave | 16.5% (6.1, 30.7) | 3 | 10,805 | 0.962 | <0.01 |  |
| Fifth wave | 9.0% (7.2, 11.0) | 1 | 884 | -- | -- |  |
| By WHO regions |  |  |  |  |  | <0.01 |
| African region | 16.6% (11.2, 22.8) | 12 | 10,756 | 0.977 | <0.01 |  |
| Americas region | 31.0% (28.8, 33.1) | 111 | 1,463,091 | 0.997 | <0.01 |  |
| Eastern Mediterranean | 25.4% (22.5, 28.4) | 90 | 128,878 | 0.993 | <0.01 |  |
| European region | 22.3% (20.9, 23.8) | 111 | 788,429 | 0.998 | <0.01 |  |
| South-East Asia | 20.6% (14.8, 27.2) | 14 | 26,639 | 0.985 | <0.01 |  |
| Western Pacific | 13.8% (12.7, 15.0) | 170 | 147,090 | 0.963 | <0.01 |  |
| By country income level |  |  |  |  |  | <0.01 |
| Low | 31.5% (10.2, 58.2) | 2 | 578 | 0.972 | <0.01 |  |
| Middle | 17.4% (16.2, 18.6) | 293 | 977,562 | 0.995 | <0.01 |  |
| High | 27.3% (25.7, 28.8) | 213 | 1,586,743 | 0.998 | <0.01 |  |
| By HAQ |  |  |  |  |  | <0.01 |
| Low | 22.1% (18.7, 25.7) | 54 | 78,767 | 0.992 | <0.01 |  |
| Medium | 17.7% (16.4, 19.1) | 266 | 927,213 | 0.995 | <0.01 |  |
| High | 26.7% (25.2, 28.3) | 188 | 1,558,903 | 0.998 | <0.01 |  |
| By DM prevalence |  |  |  |  |  | <0.01 |
| Low | 20.5% (19.1, 21.9) | 163 | 692,665 | 0.996 | <0.01 |  |
| Medium | 20.7% (19.3, 22.2) | 289 | 1,590,456 | 0.997 | <0.01 |  |
| High | 27.8% (24.1, 31.6) | 56 | 281,762 | 0.990 | <0.01 |  |
| By undiagnosed DM proportion |  |  |  |  |  | <0.01 |
| Low | 31.3% (29.4, 33.3) | 118 | 1,314,609 | 0.997 | <0.01 |  |
| Medium | 22.4% (20.9, 23.9) | 204 | 938,636 | 0.995 | <0.01 |  |
| High | 14.8% (13.5, 16.1) | 186 | 311,638 | 0.989 | <0.01 |  |
| By IGT |  |  |  |  |  | 0.39 |
| Low | 22.3% (20.8, 23.8) | 181 | 877,361 | 0.997 | <0.01 |  |
| Medium | 20.7% (19.3, 22.2) | 301 | 1,631,673 | 0.996 | <0.01 |  |
| High | 23.0% (20.0, 26.1) | 26 | 55,849 | 0.989 | <0.01 |  |
| By IGF |  |  |  |  |  | <0.01 |
| Low | 16.9% (15.8, 18.0) | 274 | 724,054 | 0.996 | <0.01 |  |
| Medium | 22.5% (20.1, 25.0) | 66 | 287,312 | 0.988 | <0.01 |  |
| High | 29.0% (27.1, 30.9) | 168 | 1,553,517 | 0.997 | <0.01 |  |

# **Appendix table 4: Global pooled prevalence of diabetes in non-severe COVID-19 patients.**

|  | Pooled prevalence (95%CI) | Number of studies | Number of participants | *I*2 | *p*heterogeneity | *p*difference |
| --- | --- | --- | --- | --- | --- | --- |
| Overall | 11.9% (10.2, 13.7) | 101 | 1,306,236 | 0.968 | <0.01 | — |
| Studies with low risk of bias | 14.7% (11.1, 18.6) | 33 | 45,443 | 0.984 | <0.01 | 0.05 |
| By COVID-19 waves |  |  |  |  |  | <0.01 |
| First wave | 10.9% (9.2, 12.7) | 82 | 40,638 | 0.954 | <0.01 |  |
| Second wave | 16.0% (9.8, 23.4) | 13 | 20,805 | 0.989 | <0.01 |  |
| Third wave | 25.9% (9.3, 47.2) | 3 | 879 | 0.969 | <0.01 |  |
| Fourth wave | 4.7% (1.7, 9.0) | 1 | 128 | -- | -- |  |
| Fifth wave | 9.2% (6.4, 12.5) | 1 | 336 | -- | -- |  |
| By WHO regions |  |  |  |  |  | <0.01 |
| African region | 9.4% (0.9, 25.7) | 2 | 332 | 0.932 | <0.01 |  |
| Americas region | 18.4% (9.5, 29.5) | 5 | 3,580 | 0.951 | <0.01 |  |
| Eastern Mediterranean | 21.0% (14.9, 27.9) | 16 | 25,806 | 0.985 | <0.01 |  |
| European region | 16.1% (12.6, 20.0) | 12 | 4,689 | 0.882 | <0.01 |  |
| South-East Asia | 9.6% (0.8, 26.5) | 2 | 1,393 | 0.852 | <0.01 |  |
| Western Pacific | 9.0% (7.4, 10.7) | 63 | 24,947 | 0.954 | <0.01 |  |
| By country income level |  |  |  |  |  | <0.01 |
| Low | 31.0% (7.1, 62.4) | 2 | 250 | 0.962 | <0.01 |  |
| Middle | 9.4% (7.9, 11.1) | 74 | 34,322 | 0.940 | <0.01 |  |
| High | 18.8% (15.2, 22.6) | 24 | 26,175 | 0.980 | <0.01 |  |
| By HAQ |  |  |  |  |  | <0.01 |
| Low | 17.7% (9.5, 28.0) | 10 | 16,334 | 0.981 | <0.01 |  |
| Medium | 9.7% (8.1, 11.4) | 73 | 29,174 | 0.938 | <0.01 |  |
| High | 19.1% (15.4, 23.0) | 17 | 15,239 | 0.976 | <0.01 |  |
| By DM prevalence |  |  |  |  |  | <0.01 |
| Low | 16.3% (11.9, 21.3) | 16 | 12,783 | 0.980 | <0.01 |  |
| Medium | 9.8% (8.1, 11.6) | 71 | 36,125 | 0.959 | <0.01 |  |
| High | 19.3% (12.9, 26.6) | 13 | 11,839 | 0.968 | <0.01 |  |
| By undiagnosed DM proportion |  |  |  |  |  | <0.01 |
| Low | 27.2% (19.3, 35.8) | 7 | 4,484 | 0.962 | <0.01 |  |
| Medium | 15.8% (12.9, 19.0) | 28 | 29,636 | 0.981 | <0.01 |  |
| High | 9.0% (7.4, 10.9) | 65 | 26,627 | 0.942 | <0.01 |  |
| By IGT |  |  |  |  |  | <0.01 |
| Low | 18.4% (14.3, 22.8) | 23 | 21,258 | 0.982 | <0.01 |  |
| Medium | 9.8% (8.1, 11.7) | 73 | 30,014 | 0.957 | <0.01 |  |
| High | 17.2% (9.2, 27.0) | 4 | 9,475 | 0.967 | <0.01 |  |
| By IGF |  |  |  |  |  | <0.01 |
| Low | 10.0% (8.3, 11.8) | 72 | 19,678 | 0.932 | <0.01 |  |
| Medium | 19.1% (12.6, 26.4) | 11 | 11,350 | 0.987 | <0.01 |  |
| High | 16.1% (11.1, 21.7) | 17 | 29,719 | 0.981 | <0.01 |  |

# **Appendix table 5: Global pooled prevalence of diabetes in severe COVID-19 patients.**

|  | Pooled prevalence (95%CI) | Number of studies | Number of participants | *I*2 | *p*heterogeneity | *p*difference |
| --- | --- | --- | --- | --- | --- | --- |
| Overall | 28.9% (27.0, 30.8) | 216 | 1,306,236 | 0.992 | <0.01 | -- |
| Studies with low risk of bias | 32.4% (29.1, 35.8) | 83 | 227,517 | 0.996 | <0.01 | <0.01 |
| By COVID-19 waves |  |  |  |  |  | <0.01 |
| First wave | 26.4% (24.4, 28.5) | 161 | 74,527 | 0.981 | <0.01 |  |
| Second wave | 37.2% (32.2, 42.4) | 34 | 194,998 | 0.997 | <0.01 |  |
| Third wave | 33.8% (27.5, 40.3) | 15 | 26,641 | 0.977 | <0.01 |  |
| Fourth wave | 60.5% (52.7, 68.1) | 1 | 152 | -- | -- |  |
| Fifth wave | -- | -- | -- | -- | -- |  |
| By WHO regions |  |  |  |  |  | <0.01 |
| African region | 26.6% (13.4, 42.4) | 4 | 578 | 0.942 | <0.01 |  |
| Americas region | 40.3% (36.9, 43.8) | 34 | 148,091 | 0.980 | <0.01 |  |
| Eastern Mediterranean | 41.0% (35.7, 46.4) | 31 | 14,012 | 0.984 | <0.01 |  |
| European region | 27.1% (24.6, 29.7) | 46 | 65,726 | 0.969 | <0.01 |  |
| South-East Asia | 36.6% (27.9, 45.8) | 9 | 1,598 | 0.920 | <0.01 |  |
| Western Pacific | 21.0% (18.6, 23.6) | 86 | 19,642 | 0.974 | <0.01 |  |
| By country income level |  |  |  |  |  | <0.01 |
| Low | 28.8% (14.8, 45.3) | 3 | 442 | 0.928 | <0.01 |  |
| Middle | 24.3% (21.8, 26.8) | 117 | 41,624 | 0.982 | <0.01 |  |
| High | 35.5% (32.9, 38.2) | 90 | 207,581 | 0.992 | <0.01 |  |
| By HAQ |  |  |  |  |  | <0.01 |
| Low | 35.1% (28.8, 41.6) | 23 | 5,824 | 0.978 | <0.01 |  |
| Medium | 24.8% (22.2, 27.6) | 110 | 44,602 | 0.987 | <0.01 |  |
| High | 33.5% (30.9, 36.2) | 77 | 199,221 | 0.993 | <0.01 |  |
| By DM prevalence |  |  |  |  |  | <0.01 |
| Low | 29.4% (26.7, 32.1) | 59 | 52,220 | 0.966 | <0.01 |  |
| Medium | 25.6% (23.1, 28.2) | 123 | 185,955 | 0.993 | <0.01 |  |
| High | 44.2% (39.7, 48.7) | 28 | 11,472 | 0.942 | <0.01 |  |
| By undiagnosed DM proportion |  |  |  |  |  | <0.01 |
| Low | 38.2% (35.0, 41.4) | 39 | 163,595 | 0.988 | <0.01 |  |
| Medium | 33.3% (30.2, 36.5) | 77 | 63,353 | 0.983 | <0.01 |  |
| High | 22.1% (19.6, 24.7) | 94 | 22,699 | 0.980 | <0.01 |  |
| By IGT |  |  |  |  |  | 0.05 |
| Low | 30.4% (27.3, 33.6) | 63 | 65,385 | 0.974 | <0.01 |  |
| Medium | 27.8% (25.2, 30.5) | 131 | 174,701 | 0.992 | <0.01 |  |
| High | 34.0% (28.6, 39.6) | 16 | 9,561 | 0.970 | <0.01 |  |
| By IGF |  |  |  |  |  | <0.01 |
| Low | 22.5% (20.3, 24.7) | 114 | 58,377 | 0.979 | <0.01 |  |
| Medium | 30.9% (27.3, 34.8) | 30 | 28,887 | 0.932 | <0.01 |  |
| High | 40.2% (37.2, 43.2) | 66 | 162,383 | 0.982 | <0.01 |  |

# **Appendix table 6: Global pooled prevalence of diabetes in deceased COVID-19 patients.**

|  | Pooled prevalence (95%CI) | Number of studies | Number of participants | *I*2 | *p*heterogeneity | *p*difference |
| --- | --- | --- | --- | --- | --- | --- |
| Overall | 34.6% (32.8, 36.5) | 217 | 1,306,236 | 0.986 | <0.01 | — |
| Studies with low risk of bias | 35.9% (33.3, 38.5) | 114 | 274,005 | 0.990 | <0.01 | 0.17 |
| By COVID-19 waves |  |  |  |  |  | 0.11 |
| First wave | 33.0% (30.9, 35.2) | 144 | 157,151 | 0.969 | <0.01 |  |
| Second wave | 36.4% (32.6, 40.4) | 53 | 250,432 | 0.994 | <0.01 |  |
| Third wave | 44.8% (35.6, 54.1) | 14 | 4,602 | 0.967 | <0.01 |  |
| Fourth wave | 33.9% (29.0, 39.0) | 2 | 345 | <0.001 | 0.95 |  |
| Fifth wave | -- | -- | -- | -- | -- |  |
| By WHO regions |  |  |  |  |  | <0.01 |
| African region | 40.4% (33.5, 47.5) | 8 | 833 | 0.760 | <0.01 |  |
| Americas region | 38.8% (35.8, 41.9) | 50 | 220,524 | 0.991 | <0.01 |  |
| Eastern Mediterranean | 37.9% (31.9, 44.1) | 43 | 11,062 | 0.982 | <0.01 |  |
| European region | 29.3% (27.1, 31.5) | 58 | 144,172 | 0.978 | <0.01 |  |
| South-East Asia | 40.3% (29.5, 51.7) | 14 | 23,925 | 0.970 | <0.01 |  |
| Western Pacific | 30.6% (27.2, 34.1) | 40 | 9,624 | 0.942 | <0.01 |  |
| By country income level |  |  |  |  |  | 0.04 |
| Low | 36.4% (27.3, 46.1) | 3 | 157 | 0.242 | 0.27 |  |
| Middle | 32.4% (29.8, 35.0) | 117 | 297,761 | 0.985 | <0.01 |  |
| High | 37.4% (34.6, 40.2) | 93 | 112,222 | 0.987 | <0.01 |  |
| By HAQ |  |  |  |  |  | <0.01 |
| Low | 42.6% (36.3, 48.9) | 34 | 28,327 | 0.968 | <0.01 |  |
| Medium | 31.2% (28.6, 33.9) | 94 | 271,799 | 0.975 | <0.01 |  |
| High | 35.4% (32.8, 38.0) | 85 | 110,014 | 0.988 | <0.01 |  |
| By DM prevalence |  |  |  |  |  | <0.01 |
| Low | 30.1% (27.8, 32.5) | 98 | 128,347 | 0.988 | <0.01 |  |
| Medium | 34.5% (31.7, 37.5) | 86 | 180,852 | 0.985 | <0.01 |  |
| High | 50.7% (46.2, 55.2) | 29 | 100,941 | 0.971 | <0.01 |  |
| By undiagnosed DM proportion |  |  |  |  |  | <0.01 |
| Low | 40.9% (37.4, 44.3) | 39 | 83,288 | 0.978 | <0.01 |  |
| Medium | 34.1% (31.5, 36.7) | 123 | 290,395 | 0.973 | <0.01 |  |
| High | 31.0% (27.1, 35.0) | 51 | 36,457 | 0.991 | <0.01 |  |
| By IGT |  |  |  |  |  | <0.01 |
| Low | 31.7% (28.9, 34.6) | 102 | 174,798 | 0.987 | <0.01 |  |
| Medium | 36.5% (33.9, 39.3) | 96 | 230,950 | 0.987 | <0.01 |  |
| High | 42.4% (36.9, 48.0) | 15 | 4,392 | 0.940 | <0.01 |  |
| By IGF |  |  |  |  |  | <0.01 |
| Low | 28.8% (26.5, 31.2) | 103 | 137,362 | 0.977 | <0.01 |  |
| Medium | 36.2% (33.2, 39.3) | 29 | 23,723 | 0.886 | <0.01 |  |
| High | 41.5% (38.2, 44.8) | 81 | 249,055 | 0.991 | <0.01 |  |

# **Appendix table 7: Meta regression analysis for the variation of diabetes prevalence in confirmed COVID-19 patients.**

|  | Univariate analysis | | | | Multivariate analysis | |
| --- | --- | --- | --- | --- | --- | --- |
| N studies | *p-*value | Coefficient (95% CI) | R2, % | *p*-value | Adjusted coefficient (95%CI) |
| COVID-19 waves (First wave) | 98 |  |  | 1.39% |  |  |
| Second wave |  | 0.302 | -0.038 (-0.110, 0.034) |  |  |  |
| Third wave |  | 0.171 | 0.127 (-0.055, 0.308) |  |  |  |
| Fourth wave |  | -- | -- |  |  |  |
| Fifth wave |  | -- | -- |  |  |  |
| WHO regions (African) | 98 |  |  | 6.83% |  |  |
| Americas region |  | 0.147 | 0.116 (-0.041, 0.274) |  |  |  |
| Eastern Mediterranean |  | 0.600 | 0.046 (-0.125, 0.216) |  |  |  |
| European region |  | 0.943 | -0.006 (-0.175, 0.163) |  |  |  |
| South-East Asia |  | 0.516 | 0.063 (-0.126, 0.252) |  |  |  |
| Western Pacific |  | 0.969 | -0.003 (-0.169, 0.163) |  |  |  |
| Country income level (Low) | 97 |  |  | 4.23% |  |  |
| Middle |  | 0.250 | 0.181 (-0.127, 0.488) |  |  |  |
| High |  | 0.114 | 0.247 (-0.060, 0.554) |  |  |  |
| HAQ (Low) | 98 |  |  | 4.81% |  |  |
| Medium |  | 0.296 | -0.051 (-0.147, 0.045) |  |  |  |
| High |  | 0.425 | 0.038 (-0.055, 0.131) |  |  |  |
| DMpre (Low) | 98 |  |  | 9.32% |  |  |
| Medium |  | 0.001 | 0.119 (0.051, 0.188) |  | 0.481 | 0.023 (-0.041, 0.087) |
| High |  | 0.106 | 0.065 (-0.014, 0.143) |  | 0.074 | 0.065 (-0.006, 0.136) |
| undia DMpre (Low) | 98 |  |  | 12.88% |  |  |
| Medium |  | 0.008 | -0.092 (-0.159, -0.025) |  |  |  |
| High |  | <0.001 | -0.177 (-0.267, -0.088) |  |  |  |
| IGT (Low) | 98 |  |  | 0.00% |  |  |
| Medium |  | 0.200 | 0.045 (-0.024, 0.115) |  |  |  |
| High |  | 0.838 | 0.013 (-0.111, 0.137) |  |  |  |
| IGF (Low) | 98 |  |  | 11.67% |  |  |
| Medium |  | 0.500 | 0.033 (-0.063, 0.130) |  | 0.422 | 0.035 (-0.050, 0.119) |
| High |  | 0.000 | 0.129 (0.058, 0.201) |  | <0.001 | 0.111 (0.055, 0.166) |
| Mean or median age, years | 67 | <0.001 | 0.010 (0.007, 0.012) | 48.70% | <0.001 | 0.010 (0.008, 0.012) |
| % of female | 97 | 0.058 | -0.234 (-0.475, 0.008) | 2.71% |  |  |
| #: Residual heterogeneity I2 = 99.8%; Explained heterogeneity R2 of the model = 62.66%; N studies = 66 | | | | | | |

# **Appendix table 8: Meta regression analysis for the variation of diabetes prevalence in non-hospitalized COVID-19 patients.**

|  | Univariate analysis | | | | Multivariate analysis | |
| --- | --- | --- | --- | --- | --- | --- |
| N studies | *p*-value | Coefficient (95% CI) | R2, % | *p*-value | Adjusted coefficient (95%CI) |
| COVID-19 waves (First wave) | 33 |  |  | 0.00% |  |  |
| Second wave |  | 0.433 | -0.046 (-0.162, 0.069) |  |  |  |
| Third wave |  | 0.767 | -0.045 (-0.345, 0.254) |  |  |  |
| Fourth wave |  | -- | -- |  |  |  |
| Fifth wave |  | -- | -- |  |  |  |
| WHO regions (African) | 34 |  |  | 10.17% |  |  |
| Americas region |  | 0.054 | 0.276 (-0.005, 0.556) |  |  |  |
| Eastern Mediterranean |  | 0.087 | 0.261 (-0.038, 0.559) |  |  |  |
| European region |  | 0.286 | 0.158 (-0.132, 0.448) |  |  |  |
| South-East Asia |  | -- | -- |  |  |  |
| Western Pacific |  | 0.274 | 0.167 (-0.132, 0.465) |  |  |  |
| Country income level (Low) | 34 |  |  | 2.17% |  |  |
| Middle |  | 0.161 | 0.212 (-0.085, 0.509) |  |  |  |
| High |  | 0.104 | 0.240 (-0.049, 0.530) |  |  |  |
| HAQ (Low) | 34 |  |  | 4.47% |  |  |
| Medium |  | 0.176 | 0.201 (-0.090, 0.491) |  |  |  |
| High |  | 0.085 | 0.252 (-0.035, 0.539) |  |  |  |
| DMpre (Low) | 34 |  |  | 21.94% |  |  |
| Medium |  | 0.001 | 0.180 (0.073, 0.287) |  | 0.001 | 0.131 (0.051, 0.211) |
| High |  | 0.055 | 0.114 (-0.003, 0.231) |  | <0.001 | 0.204 (0.107, 0.301) |
| Undiagnosed DMpre (Low) | 34 |  |  | 8.91% |  |  |
| Medium |  | 0.025 | -0.115 (-0.216, -0.014) |  |  |  |
| High |  | 0.289 | -0.096 (-0.272, 0.081) |  |  |  |
| IGT (Low) | 34 |  |  | 3.79% |  |  |
| Medium |  | 0.072 | 0.106 (-0.009, 0.222) |  |  |  |
| High |  | 0.318 | 0.089 (-0.085, 0.263) |  |  |  |
| IGF (Low) | 34 |  |  | 8.99% |  |  |
| Medium |  | 0.243 | -0.109 (-0.291, 0.074) |  |  |  |
| High |  | 0.197 | 0.071 (-0.037, 0.179) |  |  |  |
| Mean or median age, years | 19 | <0.001 | 0.012 (0.008, 0.016) | 62.02% | <0.001 | 0.012 (0.009, 0.016) |
| % of female | 30 | 0.798 | 0.066 (-0.439, 0.572) | 0.00% |  |  |
| #: Residual heterogeneity *I*2 = 97.9%; Explained heterogeneity R2 of the model = 83.44%; N studies = 19 | | | | | | |

# **Appendix table 9: Meta regression analysis for the variation of diabetes prevalence in hospitalized COVID-19 patients.**

|  | Univariate analysis | | | | Multivariate analysis | |
| --- | --- | --- | --- | --- | --- | --- |
| N studies | *p-*value | Coefficient (95% CI) | R2, % | *p-*value | Adjusted coefficient (95%CI) |
| COVID-19 waves (First wave) | 510 |  |  | 3.78% |  |  |
| Second wave |  | <0.001 | 0.074 (0.041, 0.108) |  |  |  |
| Third wave |  | 0.056 | 0.062 (-0.002, 0.125) |  |  |  |
| Fourth wave |  | 0.568 | -0.048 (-0.211, 0.116) |  |  |  |
| Fifth wave |  | 0.262 | -0.161 (-0.441, 0.120) |  |  |  |
| WHO regions (African) | 508 |  |  | 30.68% |  |  |
| Americas region |  | <0.001 | 0.171 (0.097, 0.244) |  | 0.039 | 0.123 (0.007, 0.239) |
| Eastern Mediterranean |  | 0.004 | 0.108 (0.034, 0.182) |  | 0.108 | 0.075 (-0.016, 0.166) |
| European region |  | 0.050 | 0.073 (0.000, 0.147) |  | 0.697 | -0.019 (-0.117, 0.078) |
| South-East Asia |  | 0.293 | 0.051 (-0.044, 0.147) |  | 0.103 | 0.082 (-0.017, 0.180) |
| Western Pacific |  | 0.291 | -0.039 (-0.111, 0.033) |  | 0.775 | -0.014 (-0.109, 0.081) |
| Country income level (Low) | 508 |  |  | 16.92% |  |  |
| Middle |  | 0.081 | -0.168 (-0.356, 0.020) |  | <0.001 | -0.002 (-0.148, 0.144) |
| High |  | 0.614 | -0.049 (-0.237, 0.140) |  | 0.027 | 0.182 (0.021, 0.343) |
| HAQ (Low) | 508 |  |  | 12.18% |  |  |
| Medium |  | 0.008 | -0.055 (-0.095, -0.014) |  | 0.004 | -0.092 (-0.154, -0.029) |
| High |  | 0.012 | 0.054 (0.012, 0.096) |  | <0.001 | -0.313 (-0.448, -0.179) |
| DMpre (Low) | 508 |  |  | 2.84% |  |  |
| Medium |  | 0.825 | 0.003 (-0.025, 0.031) |  | <0.001 | 0.087 (0.054, 0.120) |
| High |  | 0.000 | 0.085 (0.041, 0.129) |  | 0.018 | 0.066 (0.011, 0.121) |
| undiagnosed DMpre (Low) | 508 |  |  | 27.74% |  |  |
| Medium |  | <0.001 | -0.101 (-0.129, -0.073) |  | <0.001 | -0.013 (-0.057, 0.030) |
| High |  | <0.001 | -0.199 (-0.228, -0.170) |  | <0.001 | -0.095 (-0.162, -0.029) |
| IGT (Low) | 508 |  |  | 0.02% |  |  |
| Medium |  | 0.170 | -0.019 (-0.046, 0.008) |  |  |  |
| High |  | 0.765 | 0.009 (-0.051, 0.069) |  |  |  |
| IGF (Low) | 508 |  |  | 20.94% |  |  |
| Medium |  | <0.001 | 0.071 (0.036, 0.106) |  | 0.003 | 0.076 (0.026, 0.127) |
| High |  | <0.001 | 0.145 (0.120, 0.170) |  | 0.487 | -0.019 (-0.071, 0.034) |
| Mean or median age, years | 397 | <0.001 | 0.008 (0.006, 0.009) | 21.46% | <0.001 | 0.009 (0.007, 0.010) |
| % of female | 507 | <0.001 | -0.275 (-0.410, -0.141) | 2.95% |  |  |
| #: Residual heterogeneity *I*2 = 98.8%; Explained heterogeneity R2 of the model = 59.28%; N studies = 395 | | | | | | |

# **Appendix table 10: Meta regression analysis for the variation of diabetes prevalence in non-severe COVID-19 patients.**

|  | Univariate analysis | | | | Multivariate analysis | |
| --- | --- | --- | --- | --- | --- | --- |
| N studies | *p*-value | Coefficient (95% CI) | R2, % | *p*-value | Adjusted coefficient (95%CI) |
| COVID-19 waves (First wave) | 100 |  |  | 5.96% |  |  |
| Second wave |  | 0.061 | 0.075 (-0.004, 0.153) |  |  |  |
| Third wave |  | 0.013 | 0.195 (0.041, 0.349) |  |  |  |
| Fourth wave |  | 0.391 | -0.118 (-0.388, 0.152) |  |  |  |
| Fifth wave |  | 0.836 | -0.028 (-0.289, 0.233) |  |  |  |
| WHO regions (African) | 100 |  |  | 21.04% |  |  |
| Americas region |  | 0.214 | 0.132 (-0.076, 0.340) |  |  |  |
| Eastern Mediterranean |  | 0.085 | 0.163 (-0.022, 0.349) |  |  |  |
| European region |  | 0.300 | 0.100 (-0.089, 0.288) |  |  |  |
| South-East Asia |  | 0.977 | -0.004 (-0.257, 0.250) |  |  |  |
| Western Pacific |  | 0.944 | -0.006 (-0.184, 0.171) |  |  |  |
| Country income level (Low) | 100 |  |  | 23.89% |  |  |
| Middle |  | 0.002 | -0.280 (-0.456, -0.103) |  | 0.942 | 0.006 (-0.165, 0.178) |
| High |  | 0.118 | -0.144 (-0.325, 0.037) |  | 0.001 | 0.339 (0.131, 0.546) |
| HAQ (Low) | 100 |  |  | 16.06% |  |  |
| Medium |  | 0.009 | -0.115 (-0.201, -0.029) |  | 0.000 | -0.201 (-0.304, -0.097) |
| High |  | 0.665 | 0.022 (-0.078, 0.123) |  | <0.001 | -0.540 (-0.716, -0.363) |
| DMpre (Low) | 100 |  |  | 13.51% |  |  |
| Medium |  | 0.007 | -0.098 (-0.170, -0.027) |  |  |  |
| High |  | 0.436 | 0.038 (-0.058, 0.134) |  |  |  |
| undiagnosed DMpre (Low) | 100 |  |  | 25.57% |  |  |
| Medium |  | 0.007 | -0.139 (-0.240, -0.038) |  | 0.003 | -0.171 (-0.285, -0.057) |
| High |  | <0.001 | -0.243 (-0.338, -0.147) |  | 0.001 | -0.231 (-0.363, -0.099) |
| IGT (Low) | 100 |  |  | 14.34% |  |  |
| Medium |  | <0.001 | -0.124 (-0.186, -0.063) |  |  |  |
| High |  | 0.824 | -0.015 (-0.151, 0.121) |  |  |  |
| IGF (Low) | 100 |  |  | 11.30% |  |  |
| Medium |  | 0.002 | 0.130 (0.048, 0.213) |  | 0.542 | -0.032 (-0.135, 0.071) |
| High |  | 0.012 | 0.090 (0.020, 0.160) |  | 0.026 | -0.121 (-0.228, -0.015) |
| Mean or median age, years | 71 | <0.001 | 0.009 (0.005, 0.012) | 25.02% | <0.001 | 0.009 (0.005, 0.012) |
| % of female | 98 | 0.401 | -0.107 (-0.356, 0.142) | 0.00% |  |  |
| #: Residual heterogeneity *I*2 = 88.7%; Explained heterogeneity R2 of the model = 64.12%; N studies = 71 | | | | | | |

# **Appendix table 11: Meta regression analysis for the variation of diabetes prevalence in severe COVID-19 patients.**

|  | Univariate analysis | | | | Multivariate analysis | |
| --- | --- | --- | --- | --- | --- | --- |
| N studies | *p*-value | Coefficient (95% CI) | R2, % | *p*-value | Adjusted coefficient (95%CI) |
| COVID-19 waves (First wave) | 211 |  |  | 10.09% |  |  |
| Second wave |  | <0.001 | 0.116 (0.061, 0.171) |  |  |  |
| Third wave |  | 0.044 | 0.080 (0.002, 0.158) |  |  |  |
| Fourth wave |  | 0.018 | 0.352 (0.060, 0.643) |  |  |  |
| Fifth wave |  | -- | -- |  |  |  |
| WHO regions (African) | 210 |  |  | 35.31% |  |  |
| Americas region |  | 0.050 | 0.140 (0.000, 0.280) |  | 0.015 | -0.247 (-0.446, -0.047) |
| Eastern Mediterranean |  | 0.039 | 0.148 (0.008, 0.289) |  | 0.041 | -0.192 (-0.377, -0.008) |
| European region |  | 0.978 | 0.002 (-0.136, 0.140) |  | 0.001 | -0.365 (-0.574, -0.155) |
| South-East Asia |  | 0.204 | 0.103 (-0.056, 0.261) |  | 0.035 | 0.180 (0.013, 0.347) |
| Western Pacific |  | 0.306 | -0.071 (-0.207, 0.065) |  | 0.000 | -0.386 (-0.589, -0.183) |
| Country income level (Low) | 210 |  |  | 14.79% |  |  |
| Middle |  | 0.558 | -0.051 (-0.223, 0.120) |  |  |  |
| High |  | 0.412 | 0.072 (-0.100, 0.244) |  |  |  |
| HAQ (Low) | 210 |  |  | 9.24% |  |  |
| Medium |  | 0.001 | -0.112 (-0.181, -0.043) |  | 0.001 | 0.172 (0.068, 0.276) |
| High |  | 0.646 | -0.017 (-0.088, 0.055) |  | 0.016 | 0.151 (0.029, 0.274) |
| DMpre (Low) | 210 |  |  | 17.30% |  |  |
| Medium |  | 0.069 | -0.042 (-0.088, 0.003) |  | 0.002 | 0.105 (0.039, 0.170) |
| High |  | <0.001 | 0.154 (0.088, 0.219) |  | <0.001 | 0.242 (0.137, 0.348) |
| undiagnosed DMpre (Low) | 210 |  |  | 21.39% |  |  |
| Medium |  | 0.081 | -0.049 (-0.104, 0.006) |  | 0.425 | -0.030 (-0.104, 0.044) |
| High |  | <0.001 | -0.174 (-0.228, -0.121) |  | 0.041 | -0.121 (-0.236, -0.005) |
| IGT (Low) | 210 |  |  | 0.40% |  |  |
| Medium |  | 0.247 | -0.028 (-0.076, 0.020) |  |  |  |
| High |  | 0.389 | 0.038 (-0.049, 0.126) |  |  |  |
| IGF (Low) | 210 |  |  | 32.24% |  |  |
| Medium |  | 0.001 | 0.096 (0.041, 0.150) |  | 0.015 | 0.099 (0.019, 0.179) |
| High |  | <0.001 | 0.193 (0.152, 0.233) |  | 0.997 | 0.000 (-0.107, 0.107) |
| Mean or median age, years | 176 | 0.225 | 0.002 (-0.001, 0.006) | 0.00% | <0.001 | 0.009 (0.006, 0.013) |
| % of female | 208 | 0.010 | -0.249 (-0.438, -0.060) | 3.05% |  |  |
| #: Residual heterogeneity *I*2 = 94.4%; Explained heterogeneity R2 of the model = 53.46%; N studies = 171 | | | | | | |

# **Appendix table 12: Meta regression analysis for the variation of diabetes prevalence in deceased COVID-19 patients.**

|  | Univariate analysis | | | | Multivariate analysis | |
| --- | --- | --- | --- | --- | --- | --- |
| N studies | *p*-value | Coefficient (95% CI) | R2, % | *p*-value | Adjusted coefficient (95%CI) |
| COVID-19 waves (First wave) | 213 |  |  | 4.21% |  |  |
| Second wave |  | 0.124 | 0.036 (-0.010, 0.081) |  | 0.911 | -0.003 (-0.054, 0.048) |
| Third wave |  | 0.003 | 0.123 (0.044, 0.203) |  | 0.031 | 0.075 (0.007, 0.143) |
| Fourth wave |  | 0.916 | 0.011 (-0.199, 0.222) |  | -- | -- |
| Fifth wave |  | -- | -- |  | -- | -- |
| WHO regions (African) | 213 |  |  | 9.38% |  |  |
| Americas region |  | 0.865 | -0.010 (-0.119, 0.100) |  | 0.446 | -0.057 (-0.202, 0.089) |
| Eastern Mediterranean |  | 0.735 | -0.019 (-0.131, 0.092) |  | 0.108 | -0.108 (-0.239, 0.024) |
| European region |  | 0.044 | -0.112 (-0.221, -0.003) |  | 0.093 | -0.123 (-0.266, 0.021) |
| South-East Asia |  | 0.885 | 0.010 (-0.119, 0.138) |  | 0.851 | 0.014 (-0.135, 0.164) |
| Western Pacific |  | 0.087 | -0.098 (-0.210, 0.014) |  | 0.905 | -0.010 (-0.169, 0.150) |
| Country income level (Low) | 213 |  |  | 2.28% |  |  |
| Middle |  | 0.761 | -0.029 (-0.212, 0.155) |  | 0.873 | 0.023 (-0.260, 0.306) |
| High |  | 0.799 | 0.024 (-0.160, 0.208) |  | 0.039 | 0.317 (0.016, 0.617) |
| HAQ (Low) | 213 |  |  | 7.43% |  |  |
| Medium |  | <0.001 | -0.120 (-0.178, -0.062) |  | 0.080 | -0.093 (-0.198, 0.011) |
| High |  | 0.011 | -0.076 (-0.134, -0.017) |  | 0.000 | -0.359 (-0.557, -0.162) |
| DMpre (Low) | 213 |  |  | 22.40% |  |  |
| Medium |  | 0.016 | 0.048 (0.009, 0.087) |  | 0.276 | 0.024 (-0.019, 0.068) |
| High |  | <0.001 | 0.212 (0.156, 0.267) |  | <0.001 | 0.196 (0.126, 0.266) |
| undiagnosed DMpre (Low) | 213 |  |  | 4.48% |  |  |
| Medium |  | 0.009 | -0.071 (-0.123, -0.018) |  | 0.026 | -0.076 (-0.144, -0.009) |
| High |  | 0.001 | -0.104 (-0.166, -0.042) |  | 0.002 | -0.182 (-0.300, -0.065) |
| IGT (Low) | 213 |  |  | 4.36% |  |  |
| Medium |  | 0.016 | 0.051 (0.010, 0.092) |  |  |  |
| High |  | 0.008 | 0.109 (0.028, 0.189) |  |  |  |
| IGF (Low) | 213 |  |  | 18.59% |  |  |
| Medium |  | 0.006 | 0.079 (0.022, 0.136) |  |  |  |
| High |  | <0.001 | 0.133 (0.094, 0.173) |  |  |  |
| Mean or median age, years | 152 | 0.182 | -0.002 (-0.005, 0.001) | 0.45% | 0.012 | 0.004 (0.001, 0.006) |
| % of female | 206 | 0.883 | 0.016 (-0.194, 0.225) | 0.00% |  |  |
| #: Residual heterogeneity *I*2 = 92.5%; Explained heterogeneity R2 of the model = 56.37%; N studies = 147 | | | | | | |

# **Appendix table 13: Global relative risk (RR) and population attributable fraction (PAF) of patients with diabetes on COVID-19-related presence of severe disease.**

|  | RR of patients with diabetes for COVID-19-related **presence of severe disease** | PAF of patients with diabetes on COVID-19-related **presence of severe disease** |
| --- | --- | --- |
| Overall | 1.49 (1.36, 1.62) | **9.5% (7.3, 11.7)** |
| By COVID-19 waves |  |  |
| First wave | 1.42 (1.28, 1.57) | 7.8% (5.5, 10.2) |
| Second wave | 1.66 (1.31, 2.02) | 14.7% (8.5, 21.0) |
| Third wave | 1.51 (1.00, 2.02) | 11.0% (2.1, 19.9) |
| Fourth wave | 7.90 (1.08, 14.72) | 51.5% (41.6, 61.5) |
| Fifth wave | -- | -- |
| By WHO regions |  |  |
| African region | 1.93 (0.63, 3.23) | 12.4% (-2.0, 26.9) |
| Americas region | 1.52 (1.30, 1.73) | 13.6% (8.9, 18.3) |
| Eastern Mediterranean | 2.06 (1.62, 2.50) | 20.9% (14.8, 27.1) |
| European region | 1.30 (1.14, 1.45) | 6.2% (3.3, 9.1) |
| South-East Asia | 2.27 (1.30, 3.25) | 20.1% (9.6, 30.6) |
| Western Pacific | 1.67 (1.42, 1.91) | 8.4% (5.8, 11.0) |
| By country income level |  |  |
| Low | 1.02 (-0.25, 2.28) | -8.1% (-47.4, 31.3) |
| Middle | 1.53 (1.33, 1.73) | 8.3% (5.6, 11.0) |
| High | 1.47 (1.30, 1.64) | 11.3% (7.9, 14.7) |
| By HAQ |  |  |
| Low | 1.92 (1.39, 2.46) | 16.7% (9.5, 23.9) |
| Medium | 1.54 (1.33, 1.74) | 8.6% (5.8, 11.5) |
| High | 1.39 (1.23, 1.54) | 9.3% (6.0, 12.6) |
| By DM prevalence |  |  |
| Low | 1.62 (1.41, 1.83) | 11.2% (8.1, 14.3) |
| Medium | 1.32 (1.15, 1.49) | 6.2% (3.2, 9.1) |
| High | 2.08 (1.63, 2.53) | 22.8% (16.7, 28.9) |
| By undiagnosed DM proportion |  |  |
| Low | 1.35 (1.18, 1.53) | 9.9% (5.6, 14.1) |
| Medium | 1.74 (1.51, 1.98) | 14.2% (10.6, 17.7) |
| High | 1.64 (1.40, 1.88) | 8.6% (6.0, 11.3) |
| By IGT |  |  |
| Low | 1.53 (1.32, 1.73) | 10.5% (7.1, 14.0) |
| Medium | 1.47 (1.28, 1.66) | 8.9% (5.9, 11.9) |
| High | 1.73 (1.32, 2.14) | 14.2% (8.0, 20.5) |
| By IGF |  |  |
| Low | 1.43 (1.26, 1.60) | 6.7% (4.5, 9.0) |
| Medium | 1.55 (1.27, 1.83) | 10.9% (6.5, 15.3) |
| High | 1.65 (1.45, 1.85) | 15.8% (12.0, 19.5) |

# **Appendix table 14: Global relative risk (RR) and population attributable fraction (PAF) of patients with diabetes on COVID-19-related death.**

|  | RR of patients with diabetes for COVID-19-related death | PAF of patients with diabetes on COVID-19-related deaths |
| --- | --- | --- |
| Overall | 1.94 (1.79, 2.10) | **16.8% (14.8, 18.8)** |
| By COVID-19 waves |  |  |
| First wave | 1.95 (1.77, 2.13) | 16.1% (13.8, 18.4) |
| Second wave | 1.59 (1.31, 1.88) | 13.5% (8.4, 18.6) |
| Third wave | 2.41 (1.47, 3.35) | 25.6% (14.6, 36.7) |
| Fourth wave | 2.66 (0.54, 4.79) | 19.4% (8.5, 30.4) |
| Fifth wave | -- | -- |
| By WHO regions |  |  |
| African region | 3.44 (2.01, 4.87) | 28.3% (20.3, 36.3) |
| Americas region | 1.42 (1.23, 1.60) | 11.4% (7.2, 15.5) |
| Eastern Mediterranean | 1.81 (1.37, 2.26) | 16.9% (9.7, 24.0) |
| European region | 1.44 (1.29, 1.59) | 9.0% (6.4, 11.6) |
| South-East Asia | 2.69 (1.39, 4.00) | 25.0% (12.9, 37.1) |
| Western Pacific | 2.76 (2.36, 3.16) | 19.5% (16.3, 22.7) |
| By country income level |  |  |
| Low | 1.39 (-0.18, 2.97) | 3.0% (-29.9, 36.0) |
| Middle | 2.28 (2.02, 2.55) | 18.2% (15.5, 20.9) |
| High | 1.60 (1.41, 1.78) | 13.9% (10.5, 17.4) |
| By HAQ |  |  |
| Low | 2.63 (1.93, 3.33) | 26.2% (19.2, 33.3) |
| Medium | 2.11 (1.85, 2.36) | 16.4% (13.7, 19.1) |
| High | 1.50 (1.34, 1.67) | 11.8% (8.7, 15.0) |
| By DM prevalence |  |  |
| Low | 1.68 (1.49, 1.87) | 12.1% (9.4, 14.8) |
| Medium | 2.02 (1.76, 2.28) | 17.4% (14.1, 20.7) |
| High | 2.70 (2.13, 3.26) | 31.7% (25.9, 37.4) |
| By undiagnosed DM proportion |  |  |
| Low | 1.52 (1.31, 1.72) | 13.9% (9.4, 18.4) |
| Medium | 1.80 (1.59, 2.01) | 15.1% (12.1, 18.1) |
| High | 2.59 (2.16, 3.03) | 19.0% (15.2, 22.8) |
| By IGT |  |  |
| Low | 1.63 (1.44, 1.83) | 12.3% (9.2, 15.4) |
| Medium | 2.20 (1.94, 2.47) | 19.9% (16.9, 23.0) |
| High | 2.48 (1.91, 3.04) | 25.2% (19.0, 31.4) |
| By IGF |  |  |
| Low | 2.00 (1.77, 2.22) | 14.4% (11.9, 16.8) |
| Medium | 1.96 (1.65, 2.27) | 17.7% (13.8, 21.5) |
| High | 1.74 (1.51, 1.98) | 17.6% (13.4, 21.8) |

# **Figure S1: Global pooled prevalence of diabetes in confirmed COVID-19 patients.**

# **Figure S2: Global pooled prevalence of diabetes in non-hospitalized COVID-19 patients.**

# **Figure S3: Global pooled prevalence of diabetes in hospitalized COVID-19 patients.**

# **Figure S4: Global pooled prevalence of diabetes in non-severe COVID-19 patients.**

# **Figure S5: Global pooled prevalence of diabetes in severe COVID-19 patients.**

# **Figure S6: Global pooled prevalence of diabetes in deceased COVID-19 patients.**

# **Reference:**

1. WHO. Diagnostic testing for SARS-CoV-2. 2020. <https://www.who.int/publications/i/item/diagnostic-testing-for-sars-cov-2> (accessed Nov 29, 2021).

2. Noubiap JJ, Nansseu JR, Nyaga UF, et al. Global prevalence of diabetes in active tuberculosis: a systematic review and meta-analysis of data from 2·3 million patients with tuberculosis. *Lancet Glob Health* 2019; **7**(4): e448-e60.

3. Hoy D, Brooks P, Woolf A, et al. Assessing risk of bias in prevalence studies: modification of an existing tool and evidence of interrater agreement. *J Clin Epidemiol* 2012; **65**(9): 934-9.

4. JHU. Coronavirus Resource Center: COVID-19 Tracking. 2022. <https://coronavirus.jhu.edu> (accessed Apr 02, 2022).

5. Lab L. Tri-logistic fiting. 2021. <https://logletlab.com> (accessed Jul 30, 2021).
